# Supplementary material for: Screening of Pure ILs and DESs for CO2 Separation, N2O Separation, and H2S Separation Processes
Source: Hindawi journal article supplement (doi:10.1155/2023/8691957), 2023-02-18
Supplement: f1 [file 8691957.f1.docx]

**Screening of gas absorbents for gas separation process**

Yingying Zhanga,b,c*, Xuzhao Yanga,b,c*, Jingli Hana,c, Junfeng Tiana, Ting Zhanga, Yakun Lia,b,c, Jiangqiang Zhanga,b,c, Yuxin Shia, Jingjing Zhanga

aDepartment of Material and Chemical Engineering, Zhengzhou University of Light Industry, 450002 Zhengzhou, China

bHenan Engineering Research Center of Catalysis and Seperation of Cyclohexanol, Zhengzhou University of Light Industry, 450002 Zhengzhou, China

cZhengzhou Key Laboratory of fine chemicals, 450002 Zhengzhou, Henan, China

*Corresponding author. E-mail: [zhangyy@zzuli.edu.cn,](mailto:zhangyy@zzuli.edu.cn,) yangxz@zzuli.edu.cn; Tel./fax: +86 371 86609676

Table 1. The abbreviation, name and molar weight of absorbents in this work.

| No. | Absorbents | Full name | Structure | CAS No. | M  /g·mol-1 |
| --- | --- | --- | --- | --- | --- |
| 1 | [Emim][BF4] | 1-ethyl-3-methylimidazolium tetrafluoroborate | 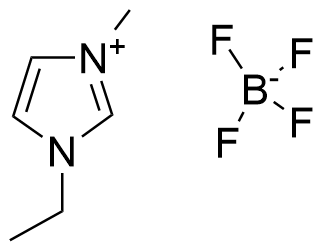 | 143314-16-3 | 197.97 |
| 2 | [Hemim][BF4] | 1-(2-hydroxyethyl)-3-methylimidazolium tetrafluoroborate | 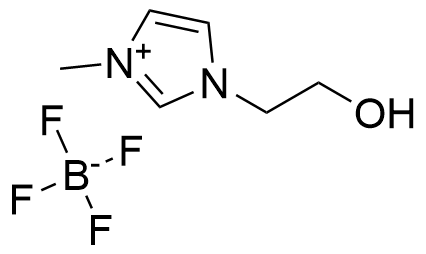 | 374564-83-7 | 223.22 |
| 3 | [Emim][PF6] | 1-ethyl-3-methylimidazolium hexafluorophosphate | 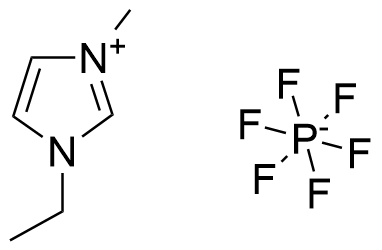 | 155371-19-0 | 256.13 |
| 4 | [Emim][NTf2] | 1-ethyl-3-methylimidazolium bis[(trifluoromethyl)sulfonyl]imide | 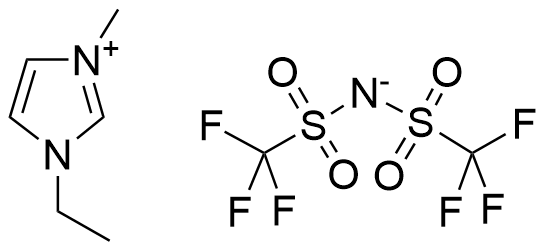 | 174899-82-2 | 391.31 |
| 5 | [Emmim][NTf2] | 1-ethyl-2,3-dimethylimidazolium bis[(trifluoromethyl)sulfonyl]imide | 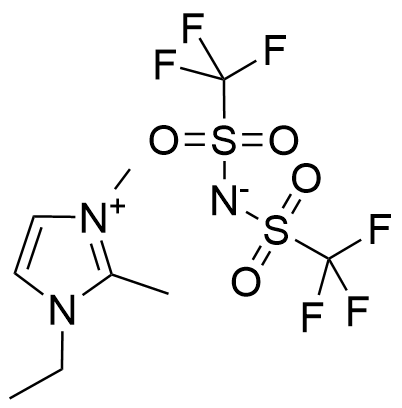 | 174899-90-2 | 405.34 |
| 6 | [Emim][OTf] | 1-ethyl-3-methylimidazolium trifluoromethanesulfonate | 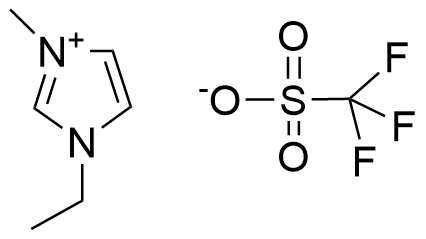 | 145022-44-2 | 260.23 |
| 7 | [Emim][EtSO4] | 1-ethyl-3-methylimidazolium ethyl sulfate | 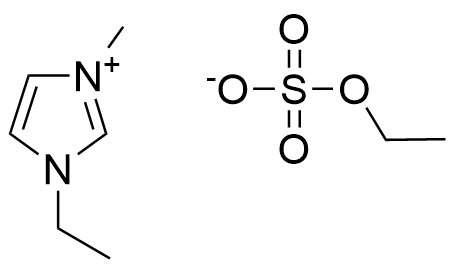 | 342573-75-5 | 236.29 |
| 8 | [Emim][Et2PO4] | 1-ethyl-3-methylimidazolium diethylphosphate | 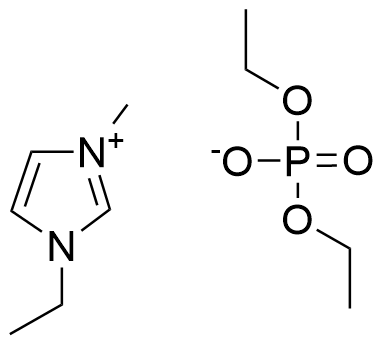 | 848641-69-0 | 264.26 |
| 9 | [Bmim][BF4] | 1-butyl-3-methylimidazolium tetrafluoroborate | 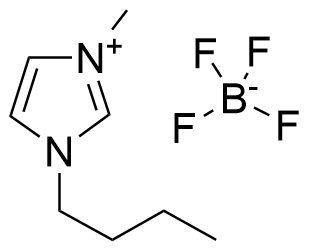 | 174501-65-6 | 226.02 |
| 10 | [Bmim][PF6] | 1-butyl-3-methylimidazolium hexafluorophosphate | 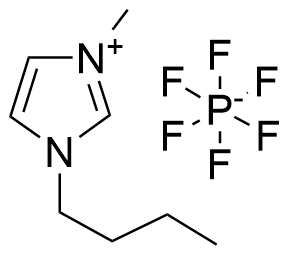 | 174501-64-5 | 284.18 |
| 11 | [Bmim][NTf2] | 1-butyl-3-methylimidazolium bis[(trifluoromethyl)sulfonyl]imide | 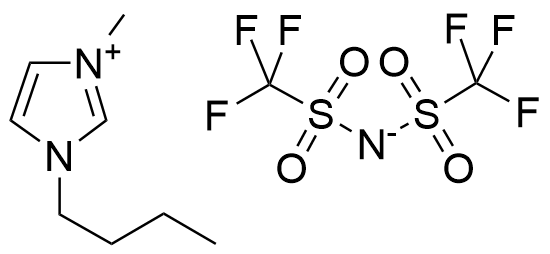 | 174899-83-3 | 419.37 |
| 12 | [Bmim][DCA] | 1-butyl-3-methylimidazolium dicyanamide | 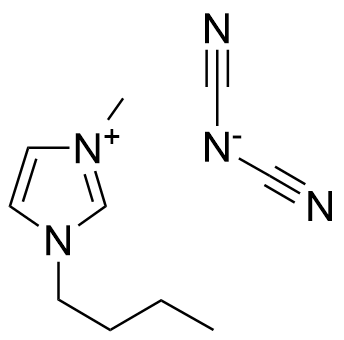 | 448245-52-1 | 205.26 |
| 13 | [Bmim][TFA] | 1-butyl-3-methylimidazolium trifluoroacetate | 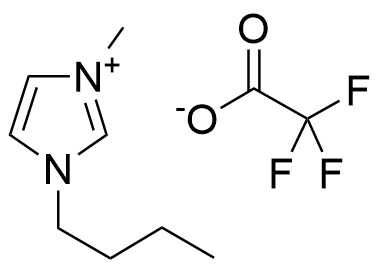 | 174899-94-6 | 252.24 |
| 14 | [Bmim][CH3SO4] | 1-butyl-3-methylimidazolium methylsulfate | 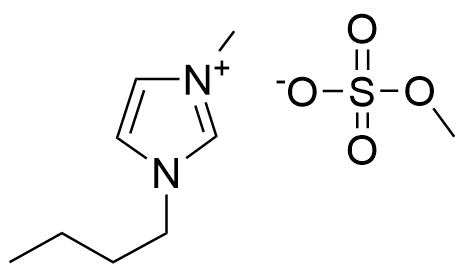 | 401788-98-5 | 250.32 |
| 15 | [Bmim][OcSO4] | 1-butyl-3-methylimidazolium octyl sulfate | 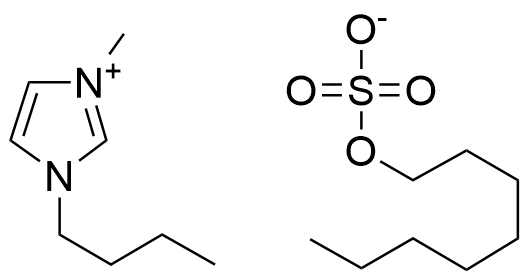 | 445473-58-5 | 348.51 |
| 16 | [Hmim][BF4] | 1-hexyl-3-methylimidazolium tetrafluoroborate | 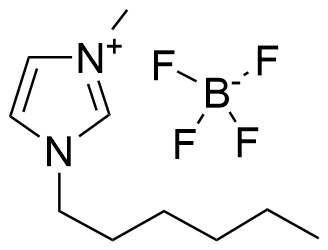 | 244193-50-8 | 254.08 |
| 17 | [Hmim][PF6] | 1-hexyl-3-methylimidazolium hexafluorophosphate | 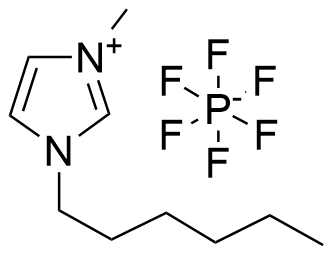 | 304680-35-1 | 312.24 |
| 18 | [Hmim][NTf2] | 1-hexyl-3-methylimidazolium bis[(trifluoromethyl)sulfonyl]imide | 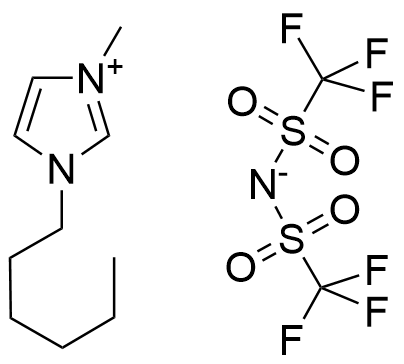 | 382150-50-7 | 447.42 |
| 19 | [Omim][BF4] | 1-methyl-3-octylimidazolium tetrafluoroborate | 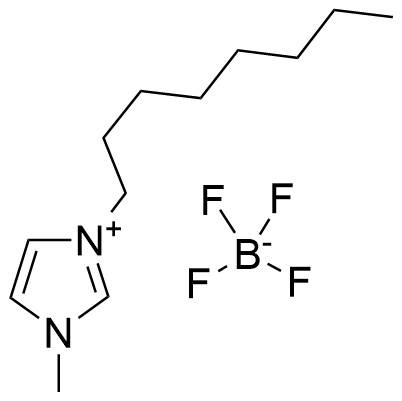 | 244193-52-0 | 282.13 |
| 20 | [Omim][PF6] | 1-methyl-3-octylimidazolium hexafluorophosphate | 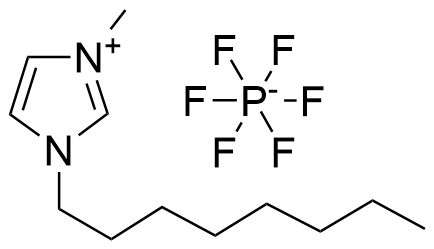 | 304680-36-2 | 340.29 |
| 21 | [Omim][NTf2] | 1-octyl-3-methylimidazolium bis[(trifluoromethyl)sulfonyl]imide | 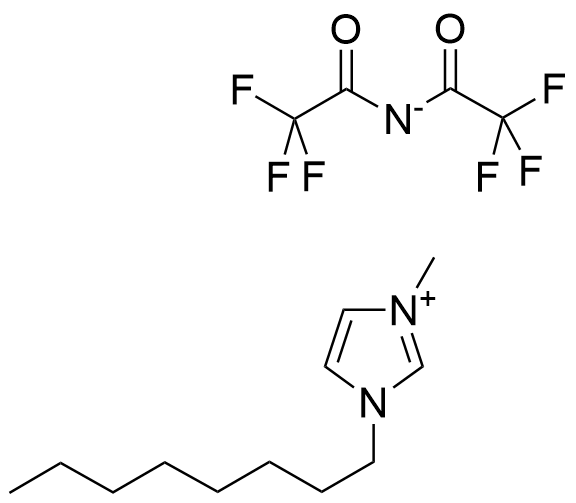 | 862731-66-6 | 475.48 |
| 22 | [C12mim][NTf2] | 1-decyl-3-methylimidazolium bis(trifluoromethylsulfonyl)imide | 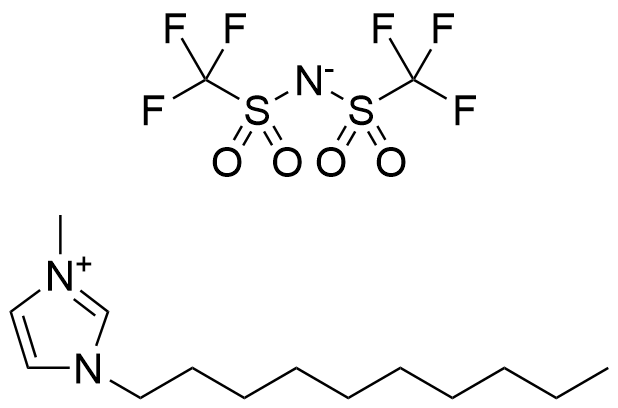 | 433337-23-6 | 503.52 |
| 23 | [BmPy][FAP] | 1-butyl-1-methylpyrrolidinium tris(pentafluoroethyl)trifluorophosphate | 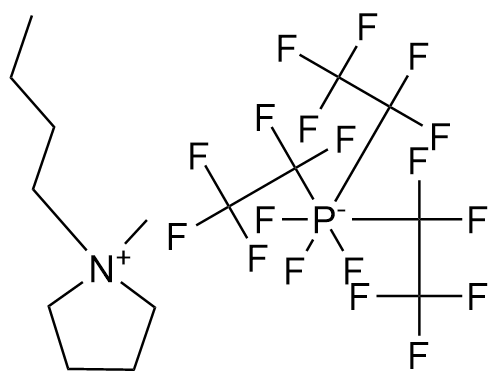 | [851856-47-8](https://www.ncbi.nlm.nih.gov/pcsubstance/?term="851856-47-8"[CompleteSynonym] AND 23082572[StandardizedCID]" \t "https://pubchem.ncbi.nlm.nih.gov/compound/_self) | 587.27 |
| 24 | [BmPy][NTf2] | 1-butyl-1-methylpyrrolidinium bis[(trifluoromethyl)sulfonyl]imide | 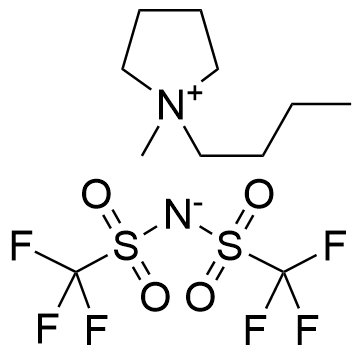 | 223437-11-4 | 422.41 |
| 25 | [Bmpy][OTf] | 1-butyl-1-methylpyrrolidinium trifluoromethanesulfonate | 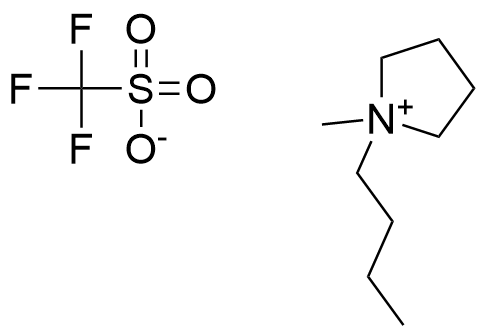 | 367522-96-1 | 291.33 |
| 26 | [Hmpy][NTf2] | 1-hexyl-3-methylpyridinium bis(trifluoromethylsulfonyl)imide | 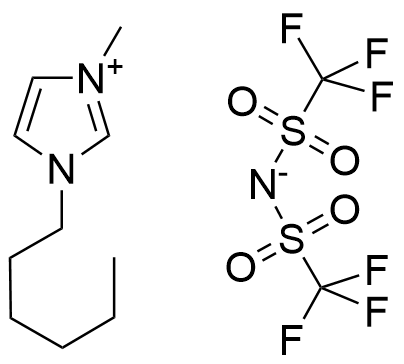 | [547718-92-3](https://www.ncbi.nlm.nih.gov/pcsubstance/?term="547718-92-3"[CompleteSynonym]" \t "https://pubchem.ncbi.nlm.nih.gov/substance/_self) | 458.45 |
| 27 | [Bpy][NTf2] | 1-butylpyridinium bis(trifluoromethylsulfonyl)imide | 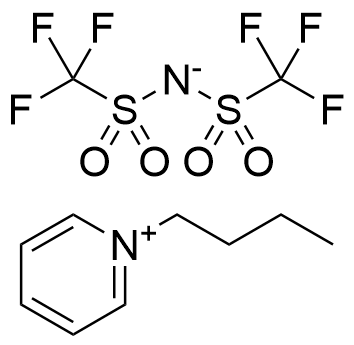 | 187863-42-9 | 416.36 |
| 28 | [N4111][NTf2] | butyltrimethylammonium bis(trifluoromethylsulfonyl)imide | 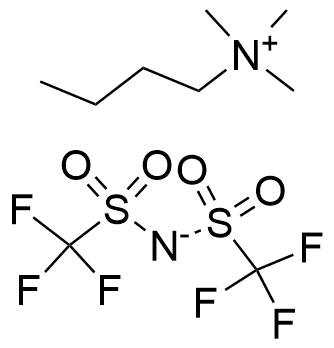 | 258273-75-5 | 396.38 |
| 29 | [Emim][Ac] | 1-ethyl-3-methylimidazolium acetate | 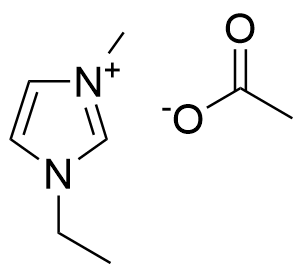 | 143314-17-4 | 170.21 |
| 30 | [Eeim][Ac] | 1-ethyl-3-ethylimidazolium acetate | 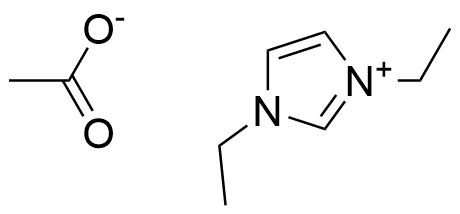 |  | 184.23 |
| 31 | [Bmim][Ac] | 1-butyl-3-methylimidazolium acetate | 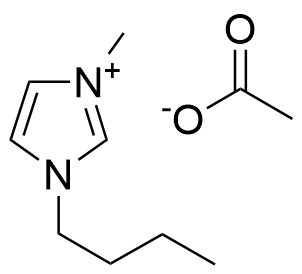 | 284049-75-8 | 198.30 |
| 32 | [P66614][FAP] | trihexyl(tetradecyl) phosphonium tris(pentafluoroethyl) trifluorophosphate | 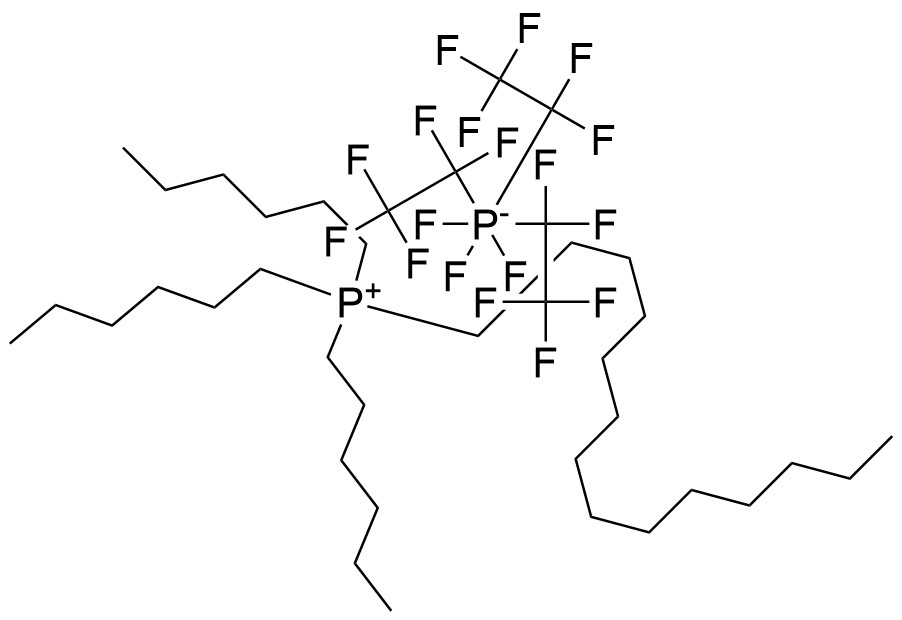 | 639092-18-5 | 928.87 |
| 33 | [Bmim][FAP] | 1-butyl-3-methylimidazolium tris(pentafluoroethyl) trifluorophosphate | 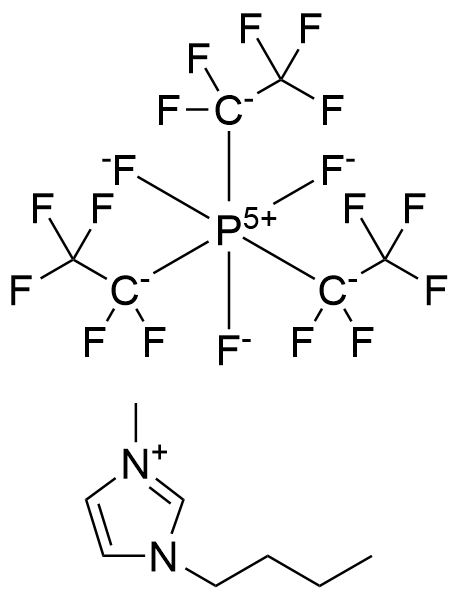 | 917762-91-5 | 284.18 |
| 34 | [Hmim][FAP] | 1-hexyl-3-methylimidazolium tris(pentafluoroethyl) trifluorophosphate | 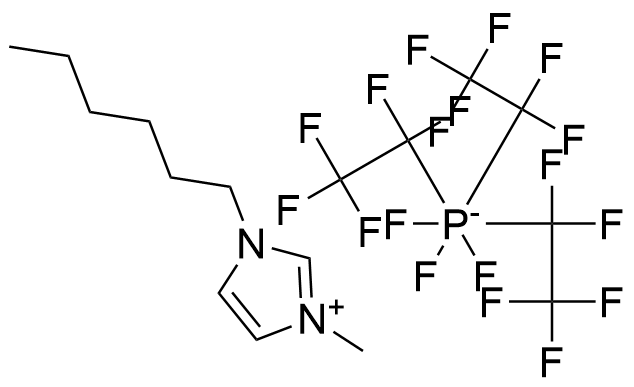 | 713512-19-7 | 212.24 |
